# Supplementary material for: CMV Primes Functional Alternative Signaling in Adaptive Δg NK Cells but Is Subverted by Lentivirus Infection in Rhesus Macaques
Source: PubMed Central journal article supplement — Cell Rep. Author manuscript; Available in PMC 2019 Feb 12. (PMC6372106; doi:10.1016/j.celrep.2018.11.020), 2018-12-04
Supplement: NIHMS1516711-supplement-1.pdf [file NIHMS1516711-supplement-1.pdf]

**Cell Reports, Volume 25**

**Supplemental Information**

**CMV Primes Functional Alternative Signaling  
in Adaptive  $\Delta$ g NK Cells but Is Subverted  
by Lentivirus Infection in Rhesus Macaques**

**Spandan V. Shah, Cordelia Manickam, Daniel R. Ram, Kyle Kroll, Hannah Itell, Sallie R. Permar, Dan H. Barouch, Nichole R. Klatt, and R. Keith Reeves**

## Supplemental Figure 1

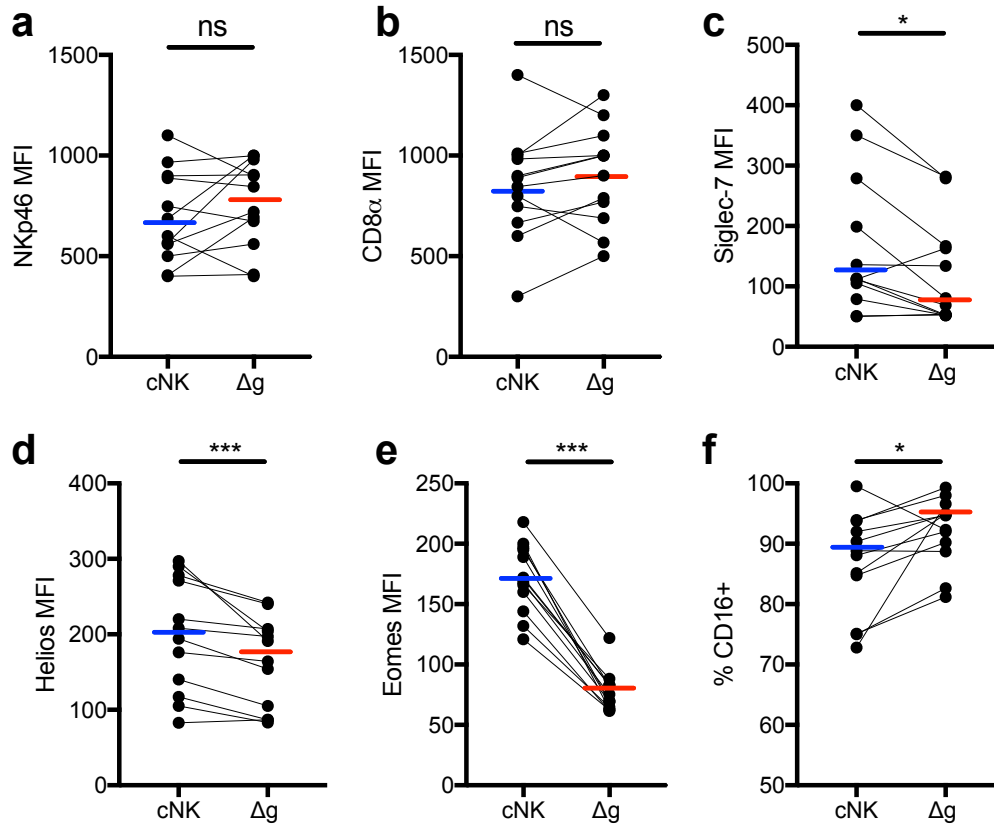

**Supplemental Figure 1. Disparate marker expression on  $\Delta g$  NK cells,** Related to Figure 1. Density of surface NKp46 (a), CD8 $\alpha$  (b), Siglec-7 (c), and intracellular Helios (d) and Eomes (e) in  $\Delta g$  and cNK cells in PBMC from rhCMV-infected macaques. (d) Percentage of CD16+ subpopulations among total  $\Delta g$  and cNK cells. Horizontal lines indicate medians and connecting lines are shown between individual animals. Statistical evaluations were made by Wilcoxon Matched Pairs test; \*, P < 0.05; \*\*\*, P < 0.001. MFI, median fluorescence intensity.

## Supplemental Figure 2

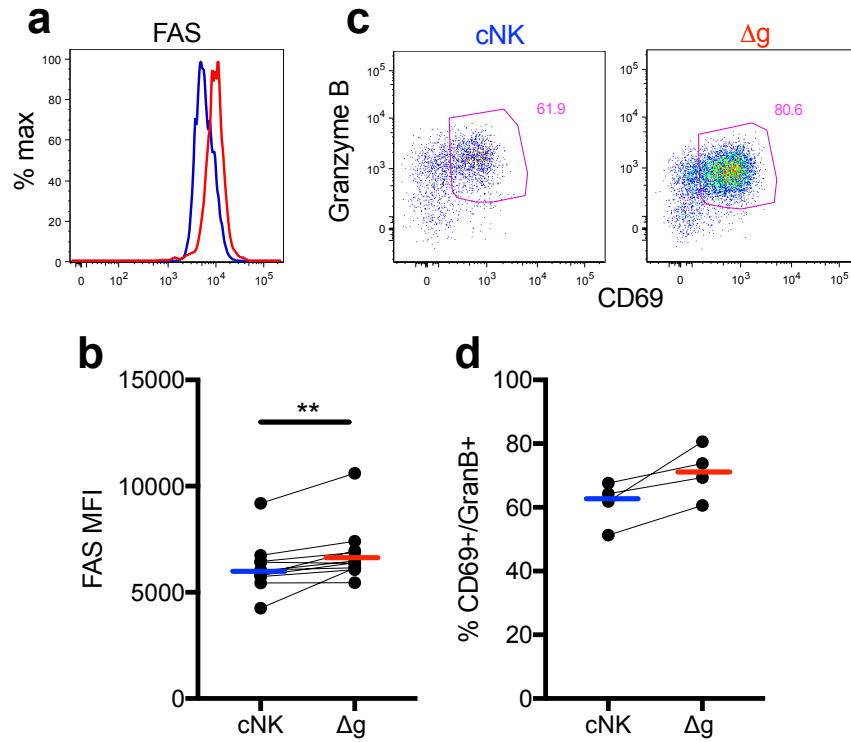

**Supplemental Figure 2. Increased FAS and cytotoxic arming of  $\Delta g$  NK cells, Related to Figure 1.** (a) Representative histograms and (b) density measurements of cell surface FAS (MFI, median fluorescence intensity) on  $\Delta g$  and cNK cells in PBMC from CMV+ macaques. (c) Representative flow cytometry plots and (d) percentages of cytotoxic-armed Granzyme B+/CD69+  $\Delta g$  and cNK cells in PBMC from rhCMV-infected macaques. Horizontal lines indicate medians and connecting lines are shown between individual animals. Statistical evaluations were made by Wilcoxon Matched Pairs test; \*\*, P < 0.01.

### Supplemental Figure 3

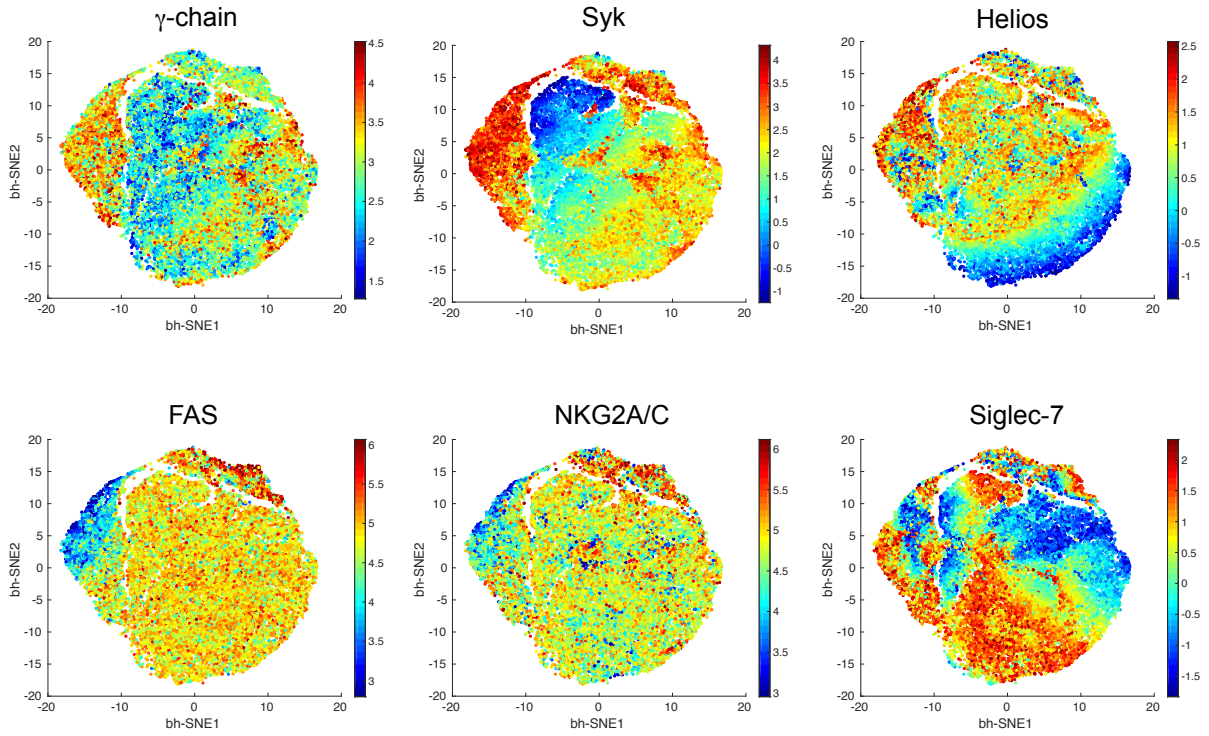

**Supplemental Figure 3.  $\Delta$ g NK cell diversification**, Related to Figure 1. Composite *t*-SNE of  $\Delta$ g NK cells from rhCMV-infected rhesus macaques as shown in **Fig. 1d**; individual markers are indicated. Data points represent individual cells and colors depict intensity of protein expression.

## Supplemental Figure 4

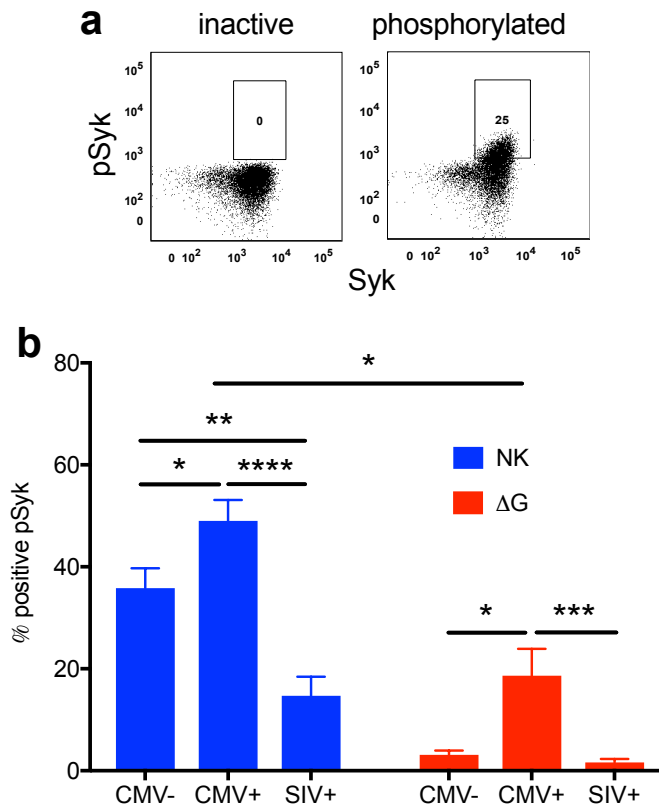

**Supplemental Figure 4. Syk is inactive in  $\Delta g$  NK cells**, Related to Figure 6. Representative plots from inactive and activated (a) phosphoSyk samples are shown.  $\Delta g$  and cNK cells were gated as shown in Figure 1. (b) Bars represent means  $\pm$  SEM of 6-10 animal samples per group. Statistical comparisons between infection groups were conducted by Mann-Whitney *U* test, and statistical comparisons between conditions for individual animals were conducted using Wilcoxon-Matched pairs test; \*,  $P < 0.05$ ; \*\*,  $P < 0.01$ ; \*\*\*,  $P < 0.001$ , \*\*\*\*,  $P < 0.0001$ .

**Supplemental Figure 5. Active ZAP70 is elevated in  $\Delta g$  NK cells,** Related to Figure 6. **(a)** Representative gating strategy to identify pZAP70 in  $\Delta g$  and cNK cells. Since a fully specific pZAP70 antibody does not exist, frequencies of pSyk<sup>+</sup> cells were subtracted from a dual pSyk/pZAP70-specific antibody to determine frequencies of pZAP70 expression. **(b)** Data are shown for percentages of pSyk<sup>-</sup>  $\Delta g$  and cNK cells between individual rhCMV-infected animals. Statistical comparisons were conducted using Wilcoxon-Matched pairs test; \*\*, P < 0.01.

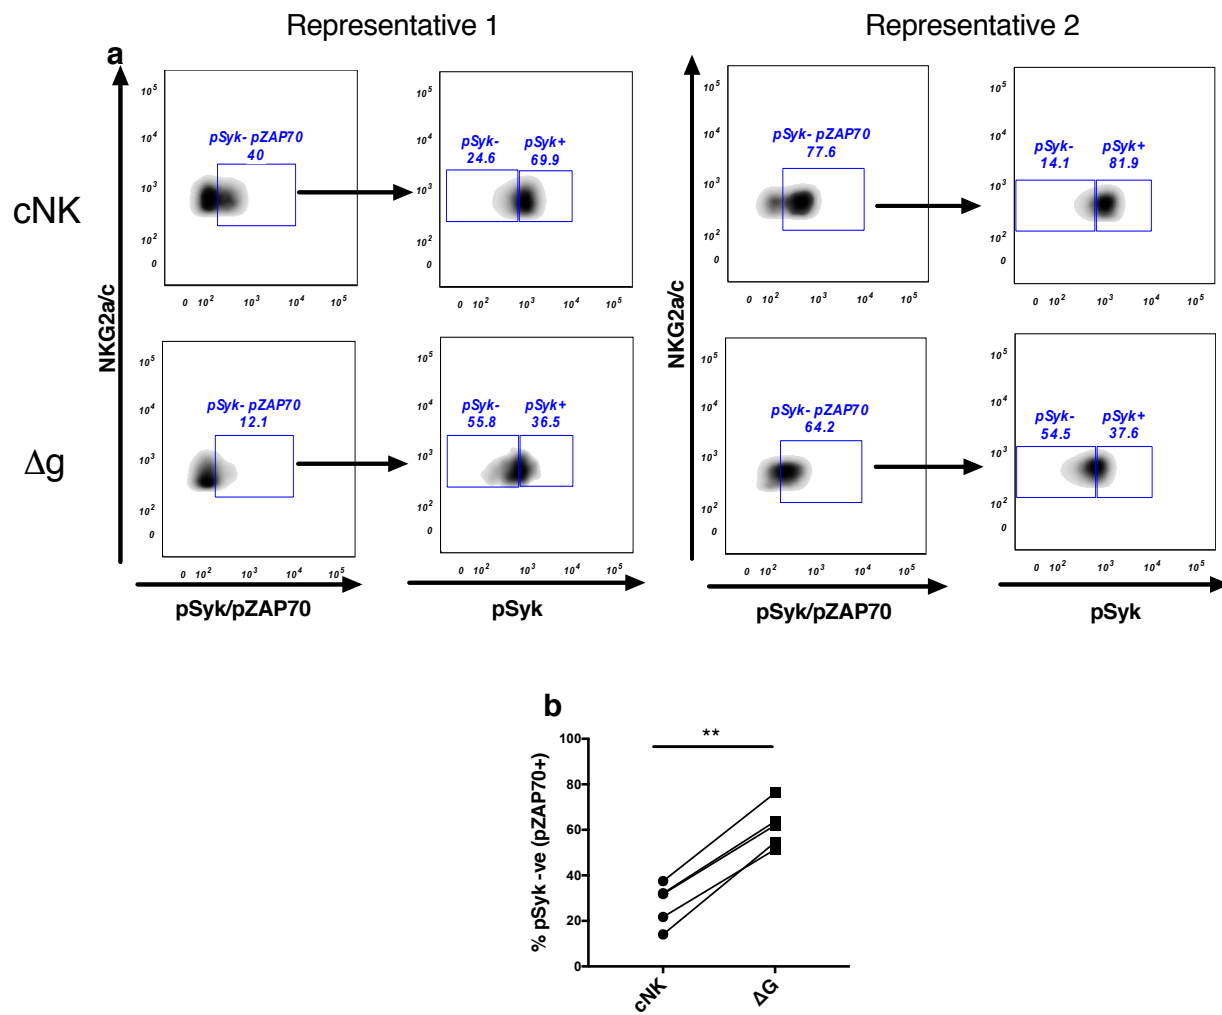

## Supplemental Figure 6

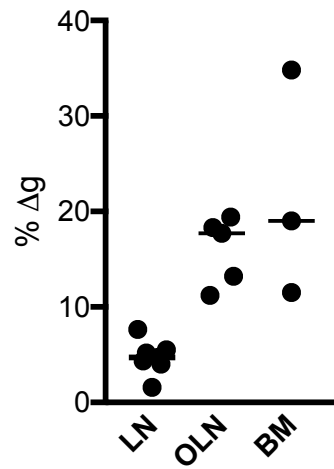

**Supplemental Figure 6.  $\Delta g$  NK cells in LN, OLN and bone marrow,** Related to Figure 3. Frequencies among bulk NK cells in rhCMV-infected, but otherwise normal rhesus macaques. Bars indicate medians. LN, lymph nodes; OLN, oral lymph nodes.
